# Supplementary material
Source: PubMed Central journal article supplement (PMC4326743)
Supplement: supp_pp.114.254425_254425Supplementary.pdf [file supp_pp.114.254425_254425Supplementary.pdf]

## Supplementary data

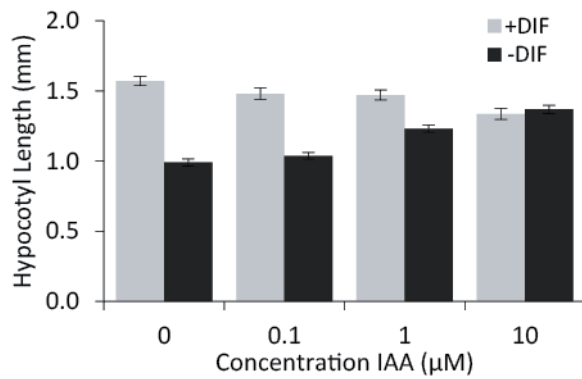

**Figure S1:** Average hypocotyl length of Col-0 with and without IAA. Bars represent means  $\pm$  s.e. (n=5x25)

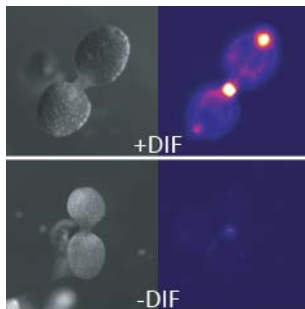

**Figure S2:** Auxin response as visualized by eDR5::*LUC* bioluminescence in representative seven day old seedlings grown under +DIF (top) or -DIF (bottom) at midday (t=6 h)

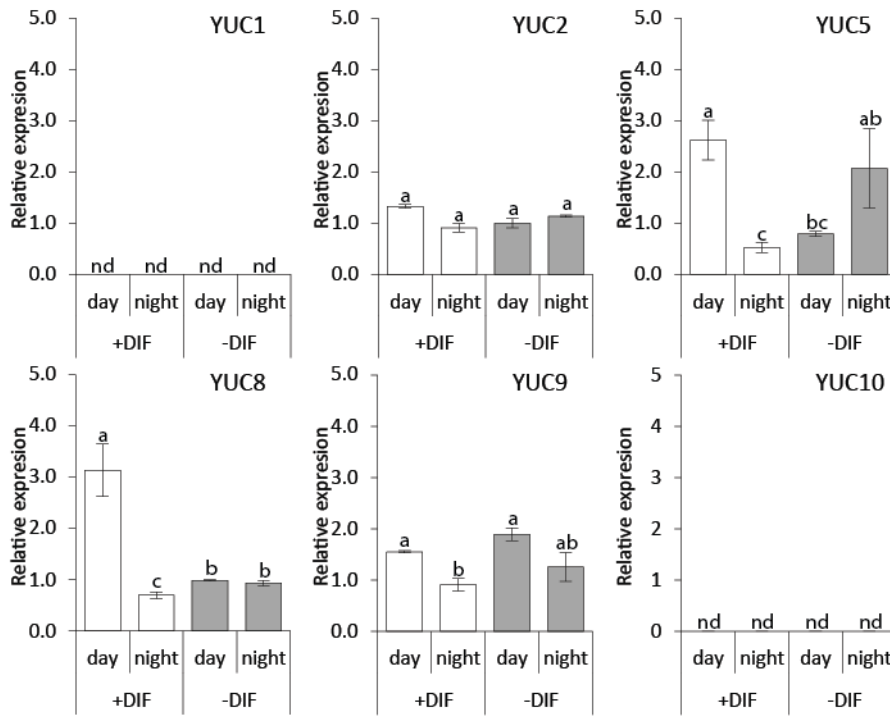

**Figure S3:** Expression analysis of *YUC* auxin biosynthesis genes at midday (6 hours, lights on = 0h) and midnight (18 hours, lights off = 12h) ( $n=3 \times 400$ ). Data represent means  $\pm$  s.e. Bars with different letters differ significantly ( $P < 0.05$ ).

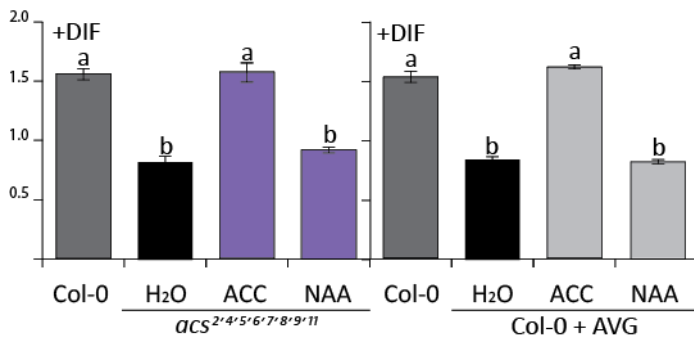

**Figure S4:** The effect of 10  $\mu$ M ACC and 1  $\mu$ M NAA application on hypocotyl elongation in *acs*<sup>2,4,5,6,7,8,9,11</sup> (*acs2-1acs4-1acs5-2acs6-1acs7-1acs9-1amiRacs8acs11*) seedlings grown for seven days under +DIF and wild-type seedlings grown in the presence of AVG ( $n=5 \times 25$ ). Bars represent means  $\pm$  s.e. Bars with different letters differ significantly ( $P < 0.05$ ).

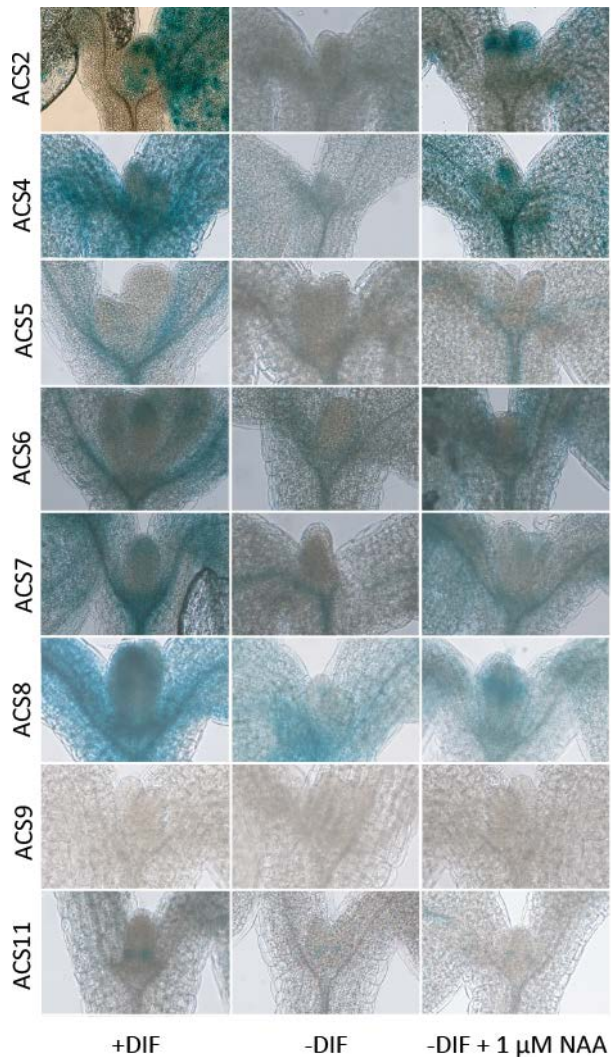

**Figure S5:** *ACS*<sup>(2,4,5,6,7,8,9,11)</sup>::*GUS* promoter activity in the apex of seven day old seedlings under +DIF, -DIF and -DIF + 1  $\mu$ M NAA.

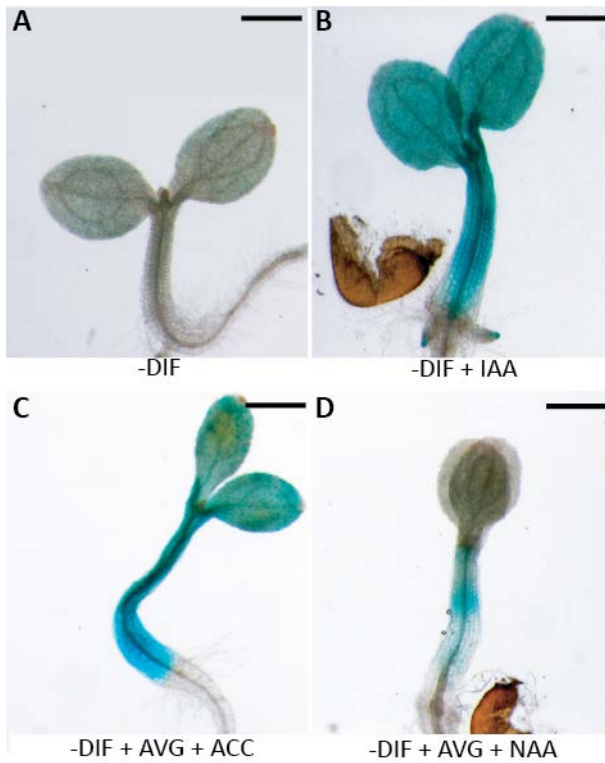

**Figure S6:** *PIF3::GUS* promoter activity under -DIF.

**A,** -DIF, **B,** -DIF + 1  $\mu$ M IAA, **C,** 2.5  $\mu$ M AVG + 10  $\mu$ M ACC, **D,** 2.5  $\mu$ M AVG + 1  $\mu$ M NAA

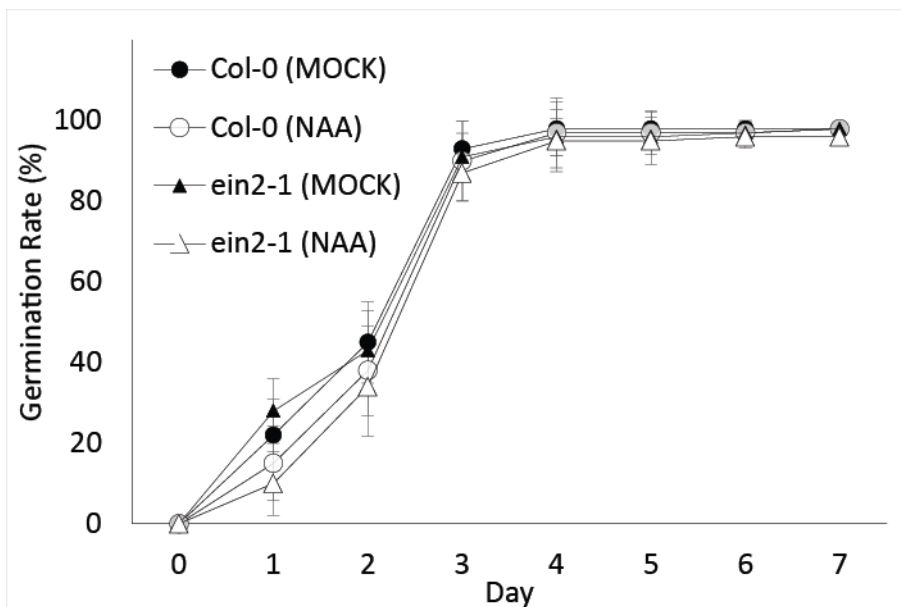

**Figure S7:** Germination rate of **Col-0** (circles) and **ein2-1** (triangles) seeds treated with 1  $\mu$ M NAA (white) compared to mock (black). Radicle emergence over 1 mm is referred to as germination. Germination rates were counted as germinated seeds/total germinated seeds at day 10. The results shown are the means  $\pm$  SD of three independent experiments (n=3x50).

**Table S1:** Primer sequences used for gene expression analysis

|         |   |                                  |                       |
|---------|---|----------------------------------|-----------------------|
| CYP79B2 | F | CAACCGAAACATCGTCCTTT             | Franklin et al., 2011 |
| CYP79B2 | R | TTGGGATCCGTCATCAATTT             | Franklin et al., 2011 |
| IAA29   | F | CTTCCAAGGGAAAGAGGGTGAC           | Sun et al., 2013      |
| IAA29   | R | TTCCGCAAAGATCTTCCATGTAAC         | Sun et al., 2013      |
| SAUR19  | F | CTTCAAGAGCTTCATAATAATTCAAACCTT   | Franklin et al., 2011 |
| SAUR19  | R | GAAGGAAAAAATGTTGGATCATCTT        | Franklin et al., 2011 |
| SAUR21  | F | TAAGCTTCAAAAACCTTTTCGTACA        | Franklin et al., 2011 |
| SAUR21  | R | CCAAATGTCCGATCATCATGATCA         | Franklin et al., 2011 |
| SAUR22  | F | GACAAATAGAGAATTATAAATGGCTCTG     | Franklin et al., 2011 |
| SAUR22  | R | ATGAATTAAGTCTATATCTAACTCGGAAA    | Franklin et al., 2011 |
| SAUR23  | F | ATTCAAACCTTTCAGACAAAAGAAATGG     | Franklin et al., 2011 |
| SAUR23  | R | ACAAGGAAACAACTCTATCTCTAACT       | Franklin et al., 2011 |
| SAUR24  | F | GAGATATTTGGTGCCTGTCTCATATTTAAACC | Franklin et al., 2011 |
| SAUR24  | R | CAAGAAGAAAGAGGAAAAAGGGCTCATC     | Franklin et al., 2011 |
| TAA1    | F | CAAGAAGCATGTCCGAGTCA             | Franklin et al., 2011 |
| TAA1    | R | AGCTTCATGTTGGCGAGTCT             | Franklin et al., 2011 |
| YUC8    | F | CCTTGAGCGTTTCGTGGGTTGTTT         | Sun et al., 2012      |
| YUC8    | R | CCTGCAATCAAACAGTTCTCGCGT         | Sun et al., 2012      |
| YUC1    | F | TGGAGAGTAAAGACTCATGAT            | Sun et al., 2012      |
| YUC1    | R | GTACTIONACTCGCGTGAACGAT          | Sun et al., 2012      |
| YUC2    | F | GGTGACACGGATCGGTTAGGGT           | Sun et al., 2012      |
| YUC2    | R | TGCCGAATAATGCATTACCCGT           | Sun et al., 2012      |
| YUC5    | F | TTCAACGAGTGTGTCCAGTCTGCT         | Sun et al., 2012      |
| YUC5    | R | TCTCTGGAACAACCTTCTCCGCGT         | Sun et al., 2012      |
| YUC9    | F | CCTGCAATCAAACAGTTCTCGCGT         | Sun et al., 2012      |
| YUC9    | R | TGAAGCCAAGAAGGGACGTTGCTA         | Sun et al., 2012      |
| YUC10   | F | TTCTGAAGTATGCTCCAGTGCGCA         | Sun et al., 2012      |
| YUC10   | R | GTTTGGTGGCGAAAGGACCTTGTT         | Sun et al., 2012      |
| UBQ5    | F | AAGGTTCCAGCGTTTGAGGAAGG          | Zhong et al., 2012    |
| UBQ5    | R | TCTTTCTGGTAAACGTAGGTGAGTC        | Zhong et al., 2012    |

- Franklin KA, Lee SH, Patel D, Kumar SV, Spartz AK, Gu C, Ye S, Yu P, Breen G, Cohen JD, Wigge PA, Gray WM (2011) Phytochrome-interacting factor 4 (PIF4) regulates auxin biosynthesis at high temperature. *Proceedings of the National Academy of Sciences of the United States of America* 108: 20231-20235
- Sun J, Qi L, Li Y, Chu J, Li C (2012) PIF4-Mediated Activation of YUCCA8 Expression Integrates Temperature into the Auxin Pathway in Regulating Arabidopsis Hypocotyl Growth. *PLoS Genetics* 8: 1002594
- Sun J, Qi L, Li Y, Zhai Q, Li C (2013) PIF4 and PIF5 Transcription Factors Link Blue Light and Auxin to Regulate the Phototropic Response in Arabidopsis. *The Plant Cell Online* 25: 2102-2114
- Zhong S, Shi H, Xue C, Wang L, Xi Y, Li J, Quail Peter H, Deng Xing W, Guo H (2012) A molecular framework of light-controlled phytohormone action in Arabidopsis. *Current biology* : CB 22: 1530-1535
